# Supplementary material
Source: MDPI journal article supplement (https://www.mdpi.com/2313-0105/9/3/183)
Supplement: s1 [file s1]

## Supplementary Information

### Investigation on the Air Stability of P2-Layered Transition Metal Oxides by Nb Doping in Sodium Ion Batteries

Yanyan Chen <sup>1,2,†</sup>, Qin hao Shi <sup>2,†</sup>, Shengyu Zhao <sup>2</sup>, Wuliang Feng <sup>2,\*</sup>, Yang Liu <sup>2</sup>, Xinxin Yang <sup>2</sup>, Zhenwei Wang <sup>1,\*</sup> and Yufeng Zhao <sup>2,\*</sup>

<sup>1</sup> School of Chemical and Environmental Engineering, Shanghai Institute of Technology, Shanghai 201418, China

<sup>2</sup> Institute for Sustainable Energy & College of Sciences, Shanghai University, Shanghai 200444, China

\* Correspondence: wuliangfeng@shu.edu.cn (W.F.); wangzhenwei@sit.edu.cn (Z.W.); yufengzhao@shu.edu.cn (Y.Z.)

† These authors contributed equally to this work.

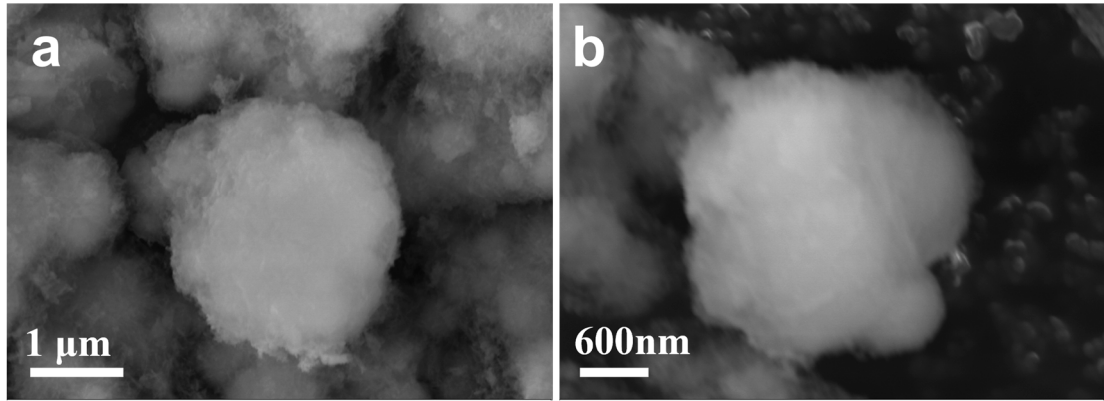

Fig. S1(a) The precursor SEM of P2-Na<sub>0.67</sub>MN and P2-Na<sub>0.67</sub>MNNb. (b) The precursor SEM of P2-Na<sub>0.67</sub>MN and P2-Na<sub>0.67</sub>MNNb.

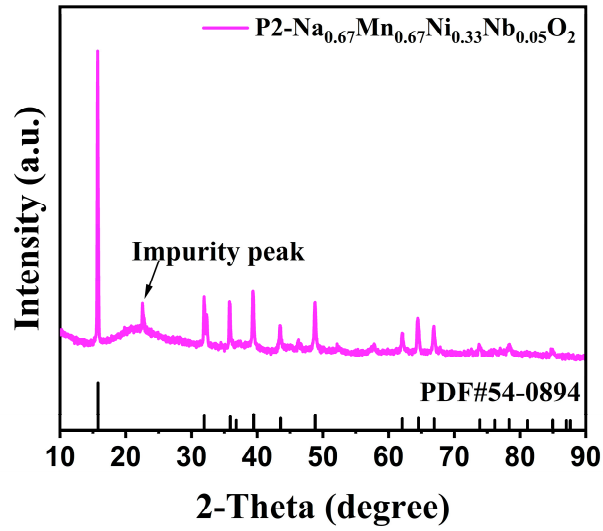

Fig. S2 The XRD patterns of  $\text{P2-Na}_{0.67}\text{Mn}_{0.67}\text{Ni}_{0.33}\text{Nb}_{0.05}\text{O}_2$ .

After mixed with  $\text{Nb}_2\text{O}_5$ ,  $\text{Na}_{0.67}\text{Mn}_{0.67}\text{Ni}_{0.33}\text{Nb}_{0.03}\text{O}_2$  had no impurity peak, but  $\text{Na}_{0.67}\text{Mn}_{0.67}\text{Ni}_{0.33}\text{Nb}_{0.05}\text{O}_2$  had impurity peak generation, indicating redundant niobium had not been into the bulk phase. When the doping amount of Nb was 0.05, the impurity peak in  $22.5^\circ$  can be labeled as  $\text{Na}_3\text{NbO}_4$ .

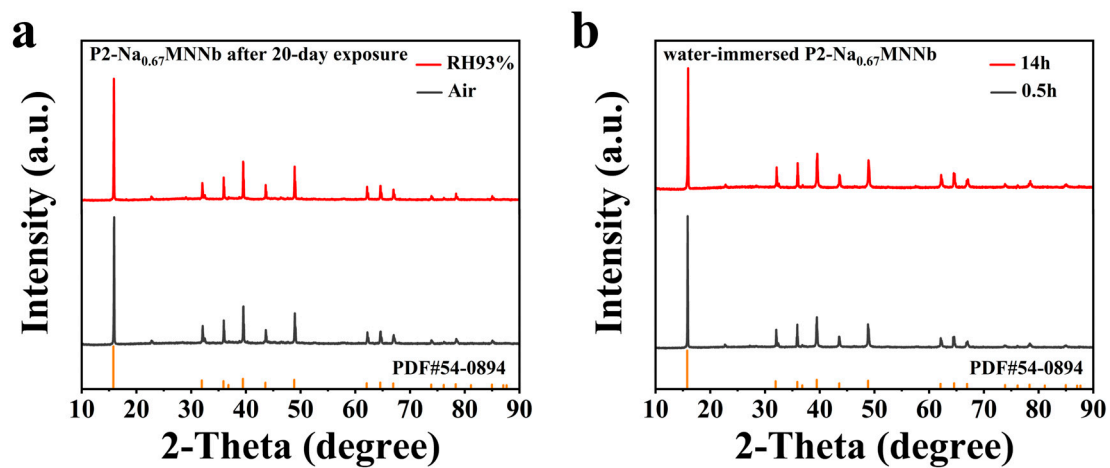

Fig. S3 (a) The XRD patterns of P2-Na<sub>0.67</sub>MNNb sample exposed in different atmosphere after 20-day exposure. (b) The XRD patterns of water-immersed P2-Na<sub>0.67</sub>MNNb sample.

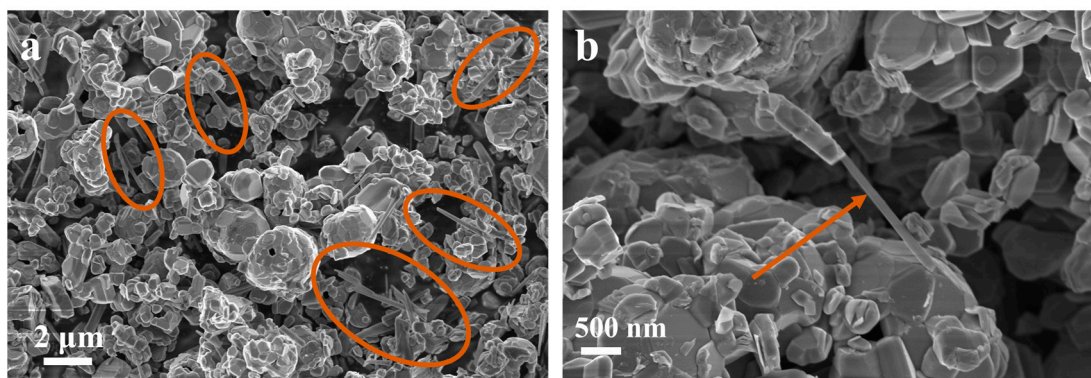

Fig. S4 (a) The SEM of P2- $\text{Na}_{0.67}\text{MN}$  after 20 days of air exposure. (b) The SEM of P2- $\text{Na}_{0.67}\text{MN}$  after 20 days of air exposure.

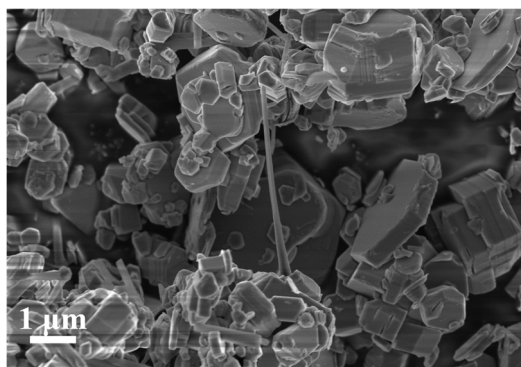

Fig. S5 The SEM of P2-Na<sub>0.67</sub>MNNb after 20 days of air exposure.

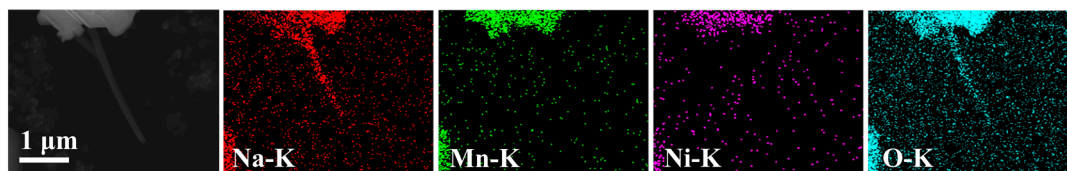

Fig. S6 SEM-EDS elemental mappings of rod-like particles in P2-Na<sub>0.67</sub>MN sample.

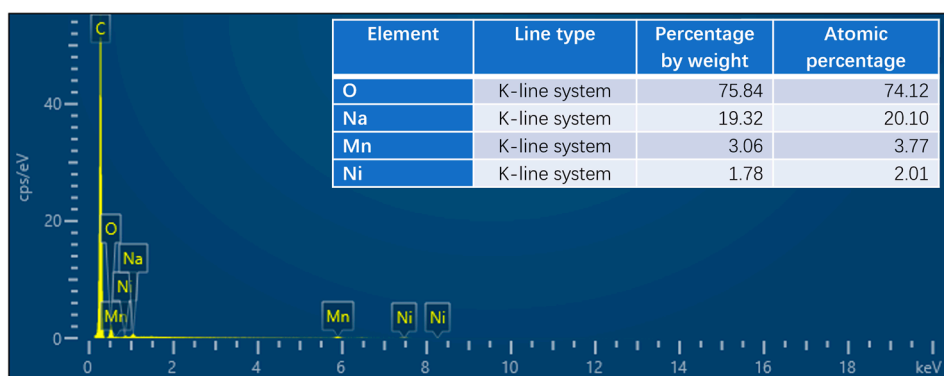

Fig. S7 The spectrum diagram of total distribution diagram for SEM-EDS of rod-like particles in P2-Na<sub>0.67</sub>Mn sample.



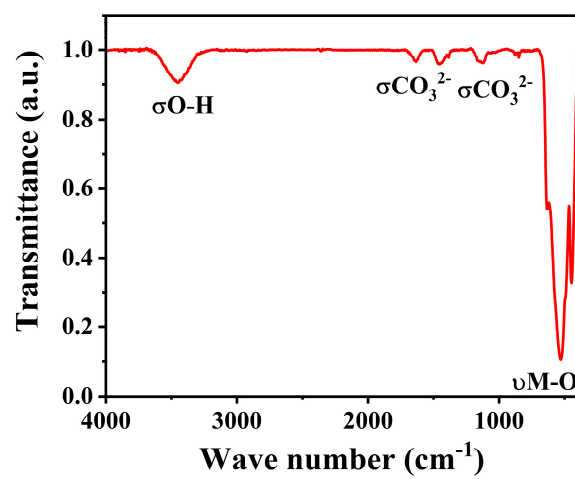

Fig. S8 The FTIR of P2-Na<sub>0.67</sub>MN after 20 days of air exposure.

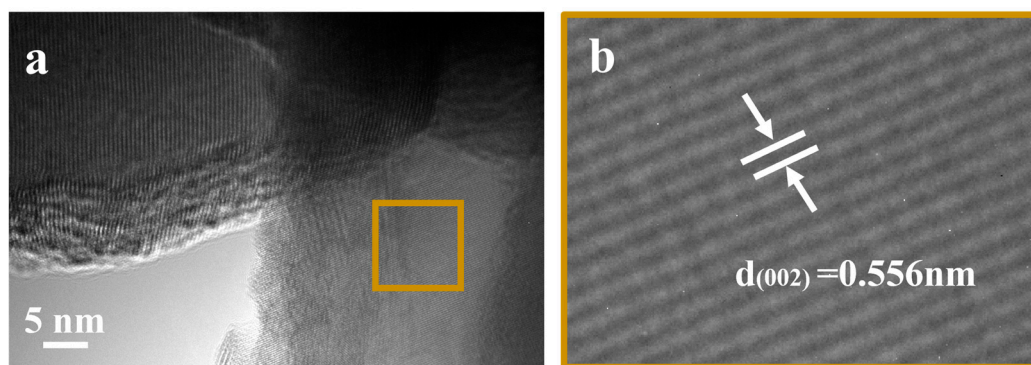

Fig. S9 (a) The TEM images of P2-Na<sub>0.67</sub>MN. (b) The TEM images of P2-Na<sub>0.67</sub>MN.

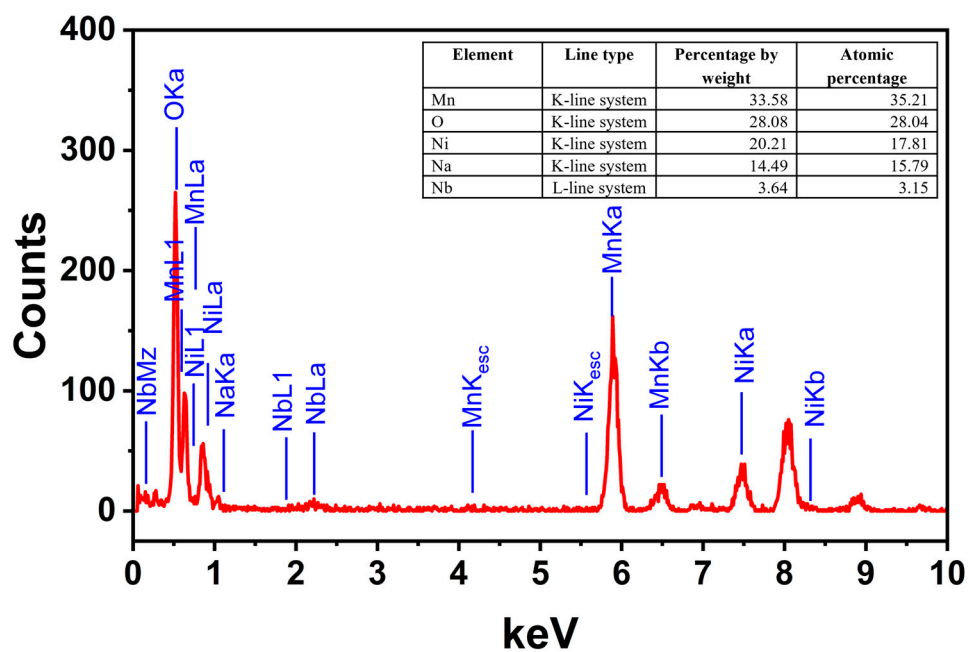

Fig. S10 The spectrum diagram of total distribution diagram for HADDF-EDS of P2-

Na<sub>0.67</sub>MNNb.

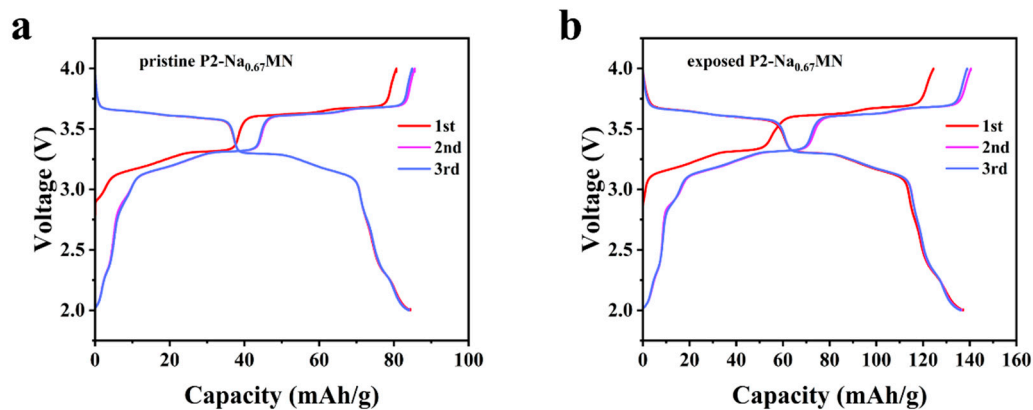

Fig. S11 Galvanostatic charge/discharge voltage profiles of (a) the pristine P2-Na<sub>0.67</sub>MN and (b) exposed P2-Na<sub>0.67</sub>MN at the first three cycles at 0.2 C in the voltage range of 2-4 V (exposed P2-Na<sub>0.67</sub>MN refers to exposing pristine P2-Na<sub>0.67</sub>MN to RH93% humid environment for 20 days).

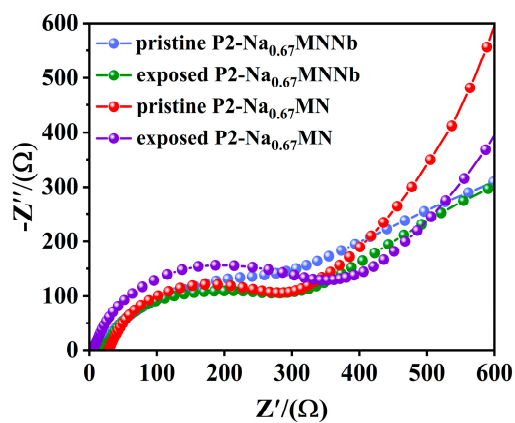

Fig. S12 Nyquist plot of the coin cells that based on pristine P2-Na<sub>0.67</sub>MN, exposed P2-Na<sub>0.67</sub>MN, pristine P2-Na<sub>0.67</sub>MNNb and exposed P2-Na<sub>0.67</sub>MNNb electrode materials.

Table. S1 The ICP date of P2-Na<sub>0.67</sub>MN and P2-Na<sub>0.67</sub>MNNb cathode materials.

| ICP results (mol mL <sup>-1</sup> )                                                        | Na   | Mn   | Ni   | Nb   |
|--------------------------------------------------------------------------------------------|------|------|------|------|
| Na <sub>0.67</sub> Mn <sub>0.67</sub> Ni <sub>0.33</sub> O <sub>2</sub>                    | 0.67 | 0.67 | 0.33 |      |
| Na <sub>0.67</sub> Mn <sub>0.67</sub> Ni <sub>0.33</sub> Nb <sub>0.03</sub> O <sub>2</sub> | 0.67 | 0.67 | 0.30 | 0.03 |

Table. S2 Crystallographic parameters of P2-Na<sub>0.67</sub>MNNb refined by the Rietveld method.

| Atoms | Wycoff<br>position | X       | Y        | Z       | Occupancy |
|-------|--------------------|---------|----------|---------|-----------|
| Na1   | 2b                 | 0       | 0        | 0.25000 | 0.30      |
| Na2   | 2d                 | 0.66670 | 0.333330 | 0.25000 | 0.37      |
| Ni    | 2a                 | 0       | 0        | 0       | 0.31      |
| Mn    | 2a                 | 0       | 0        | 0       | 0.67      |
| O     | 4f                 | 0.66670 | 0.33330  | 0.07950 | 1         |
| Nb    | 2a                 | 0       | 0        | 0       | 0.03      |

Space group: P6<sub>3</sub>/mmc (space group no. 194), a=2.88749 Å, c=11.16065 Å, Rwp=4.32%.

Table. S3 Crystallographic parameters of P2-Na<sub>0.67</sub>MN refined by the Rietveld method.

| Atoms | Wycoff<br>position | X       | Y       | Z       | Occupancy |
|-------|--------------------|---------|---------|---------|-----------|
| Na1   | 2b                 | 0       | 0       | 0.25000 | 0.36      |
| Na2   | 2d                 | 0.66670 | 0.33330 | 0.25000 | 0.31      |
| Ni    | 2a                 | 0       | 0       | 0       | 0.33      |
| Mn    | 2a                 | 0       | 0       | 0       | 0.67      |
| O     | 4f                 | 0.66670 | 0.33330 | 0.05180 | 1         |

Space group: P6<sub>3</sub>/mmc (space group no. 194), a=2.88504 Å, c=11.15540 Å, Rwp=5.62%.
